# Supplementary material
Source: MDPI journal article supplement (https://www.mdpi.com/1424-8247/15/7/861)

# **Plant alkylbenzenes and terpenoids in the form of cyclodextrin inclusion complexes as antibacterial agents and levofloxacin synergists**

Igor D. Zlotnikov <sup>1</sup>, Natalya G. Belogurova <sup>1</sup>, Sergey S. Krylov <sup>2</sup>, Marina N. Semenova <sup>3</sup>, Victor V. Semenov <sup>2</sup>  
and Elena V. Kudryashova <sup>1,\*</sup>

<sup>1</sup> Department of Chemistry, M.V. Lomonosov Moscow State University, Leninskie Gory, 1/11B,  
119991 Moscow, Russia; zlotnikovid@my.msu.ru (I.D.Z.); nbelog@mail.ru (N.G.B.)

<sup>2</sup> N. D. Zelinsky Institute of Organic Chemistry RAS, 47 Leninsky Prospect, 119991 Moscow, Russia; forward1953@yandex.ru (S.S.K.); vs@chemical-block.com (V.V.S.)

<sup>3</sup> N. K. Koltzov Institute of Developmental Biology RAS, 26 Vavilov Street, 119334 Moscow, Russia; ms@chemical-block.com

\* Correspondence: helena\_koudriachova@hotmail.com

## Content

1. Figure S1. Baseline corrected UV spectra of (a) EG, 15 mM, (b) apiol, 15.8 mM, and their inclusion complexes with HPCD. Conditions are given in Materials and Methods, sections 3.3 and 3.4.
2. Figure S2. (a)  $\lambda_{\max}$  (nm) absorbance position of eugenol (EG) allyl group in EG-HPCD complex. (b) UV spectra of apiol-HPCD presented in Figure S1b converted to the Hill plot. Theta is a fraction of the bound substance:  $\theta = [\text{EG-HPCD}] / ([\text{EG-HPCD}] + [\text{EG}])$ . Aqueous solutions, 22 °C.
3. Figure S3. Entrapment efficiency (EE) of apiol (a) and eugenol (b) into (2-hydroxypropyl)- $\beta$ -cyclodextrin (HPCD) in aqueous solutions at 22 °C and A<sub>280</sub>. Hill plots. The EE plateau is reached at a level lower than 100% due to the partial presence of EG and apiol in dissolved form in water, not in the form of a complex with CD. However, solubility efficiency is aiming for 100%. C<sub>0</sub> – theoretical concentration under the assumption that 100% of the substance has dissolved, C<sub>max</sub> – the maximum practically achievable concentration.
4. Figure S4. (a) FTIR spectra peak intensity at 1505 cm<sup>-1</sup> for apiol and its inclusion complexes with HPCD. (b) Minimum position of second derivative (d<sup>2</sup>A/dv<sup>2</sup>) of FTIR spectra of eugenol and its inclusion complexes with HPCD versus HPCD concentration. (c) Data of (b) converted to the Hill plot. Theta is a fraction of the bound substance:  $\theta = [\text{EG-HPCD}] / ([\text{EG-HPCD}] + [\text{EG}])$ . Aqueous solutions, 22 °C.
5. Figure S5: Second derivative (d<sup>2</sup>A/dv<sup>2</sup>) of FTIR spectra of eugenol and its inclusion complex with HPCD. A baseline correction was applied. Conditions are given in Materials and Methods, sections 3.4, 3.5;
6. Figure S6: (a) Micrography of the EG-HPCD solid inclusion complex of 1.3 × 1.5 mm in size. (b), (c) Corresponding FTIR spectra at 16 points selected in (a). (d) Integral intensity of 1482–1562 cm<sup>-1</sup> region in solid phase FTIR spectra of eugenol-HPCD. (e) Integral intensity of 1536–1499 cm<sup>-1</sup> region in solid phase FTIR spectra, normalized to the corresponding intensity of C–O–C bonds of cyclodextrin at 1020-1180 cm<sup>-1</sup>;
7. Figure S7: Micrographs illustrating the inclusion of eugenol (EG) in a HPCD. Dissolving oil droplets. (a) EG, (b) EG–HPCD (3.5:1), (c) EG–HPCD (1:1), (d) EG–HPCD (1:5). (e) Crystalline EG–HPCD (1:1) inclusion complex – analog (c) after evaporation of water. The molar ratio of the components is given in parentheses. Dissolving oil droplets of undissolved eugenol. Scale bar: 100 mm;
8. Figure S8: Micrographs illustrating the inclusion of apiol in a HPCD. Dissolving process. (a) Apiol, (b) Apiol–HPCD (2:1), (c) Apiol–HPCD (1:1), (d) Apiol–HPCD (1:15). The molar ratio of the components is given in parentheses. Scale bar: 100 mm;
9. Figure S9. <sup>1</sup>H NMR-spectra (600 MHz) of apiol in DMSO-d<sub>6</sub> (A); MCD-apiol in D<sub>2</sub>O, molar ratio 2:1 (B); HPCD-EG in D<sub>2</sub>O, molar ratio 2:1 (C); HPCD-Lev-EG in D<sub>2</sub>O, molar ratio 4:1:1 (D). Computer simulation's structures of CD (E), MCD (F), HPCD (G) in comparison with literature X-ray data (H) [43].
10. Figure S10: *B. subtilis* growth inhibition by (a) levofloxacin–MCD (1:2), (b) eugenol–MCD (1:2). The molar ratio of the components is given in parentheses. Small bold red crosses refer to the absence of bacterial growth inhibition; large green crosses indicate the diameter of growth inhibition zone. Experimental conditions here and thereafter in Figures S10–S13: pH 7.4 (0.01 M PBS), 37 °C, 24 h of incubation. MCD: methyl- $\beta$ -cyclodextrin;

11. Figure S11: *E. coli* growth inhibition by levofloxacin–MCD ( $C(\text{Lev}) = 0.15 \mu\text{g/mL}$ ) with adjuvant menthol–MCD (the concentrations of menthol are indicated in the figure). Small bold red crosses refer to the absence of bacterial growth inhibition; large red crosses indicate the diameter of growth inhibition zone;
12. Figure S12: *E. coli* growth inhibition by levofloxacin–MCD ( $C(\text{Lev}) = 0.15 \text{ mg/mL}$ ) with adjuvant apiol–MCD (the concentrations of apiol are indicated in the figure). Small bold red crosses refer to the absence of bacterial growth inhibition. Black crosses indicate the diameter of growth inhibition zone;
13. Figure S13: *B. subtilis* growth inhibition by levofloxacin–MCD ( $C(\text{Lev}) = 0.4; 0.7 \text{ and } 1.5 \text{ mg/mL}$ ) with adjuvant eugenol–MCD (the concentrations of eugenol are indicated in the figure). Small bold red crosses refer to the absence of bacterial growth inhibition. Black crosses indicate the diameter of growth inhibition zone;
14. Figure S14: *B. subtilis* growth inhibition by levofloxacin–MCD ( $C(\text{Lev}) = 0.4; 0.7 \text{ and } 1.5 \text{ mg/mL}$ ) with adjuvant safrole–MCD (the concentrations of safrole are indicated in the figure). Small bold red crosses refer to the absence of bacterial growth inhibition. Black crosses indicate the diameter of growth inhibition zone.

**Figure S1.** Baseline corrected UV spectra of (a) EG, 15 mM, (b) apiol, 15.8 mM, and their inclusion complexes with HPCD. Conditions are given in Materials and Methods, sections 3.3 and 3.4.

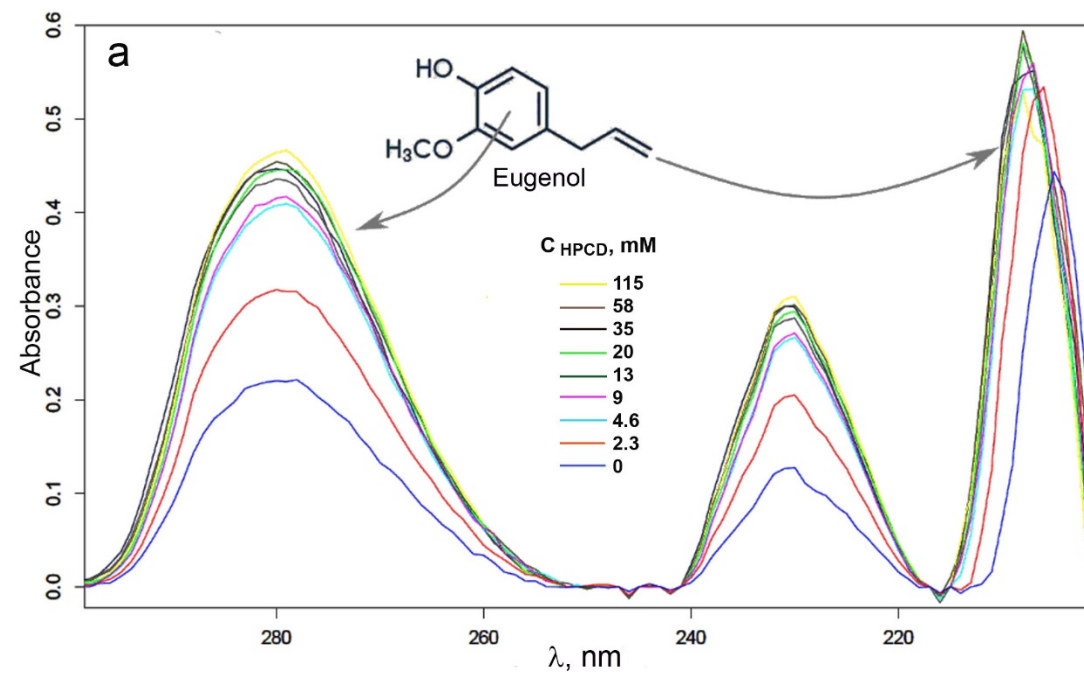

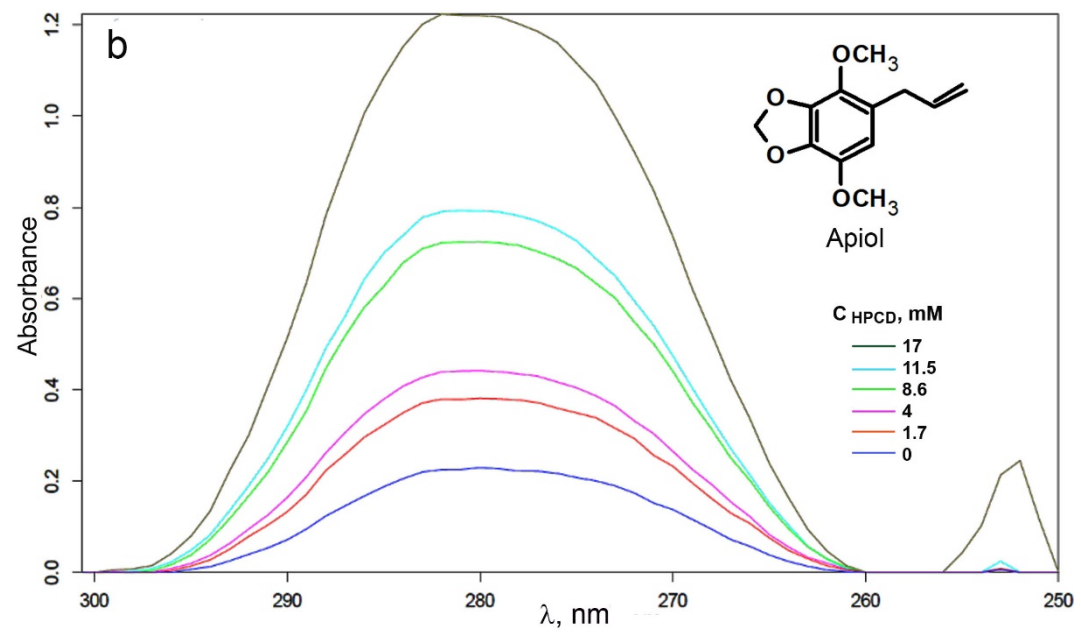

**Figure S2.** (a)  $\lambda_{\max}$  (nm) absorbance position of eugenol (EG) allyl group in EG-HPCD complex. (b) UV spectra of apiol-HPCD presented in Figure S1b converted to the Hill plot. Theta is a fraction of the bound substance:  $\theta = [\text{EG-HPCD}] / ([\text{EG-HPCD}] + [\text{EG}])$ . Aqueous solutions, 22 °C.

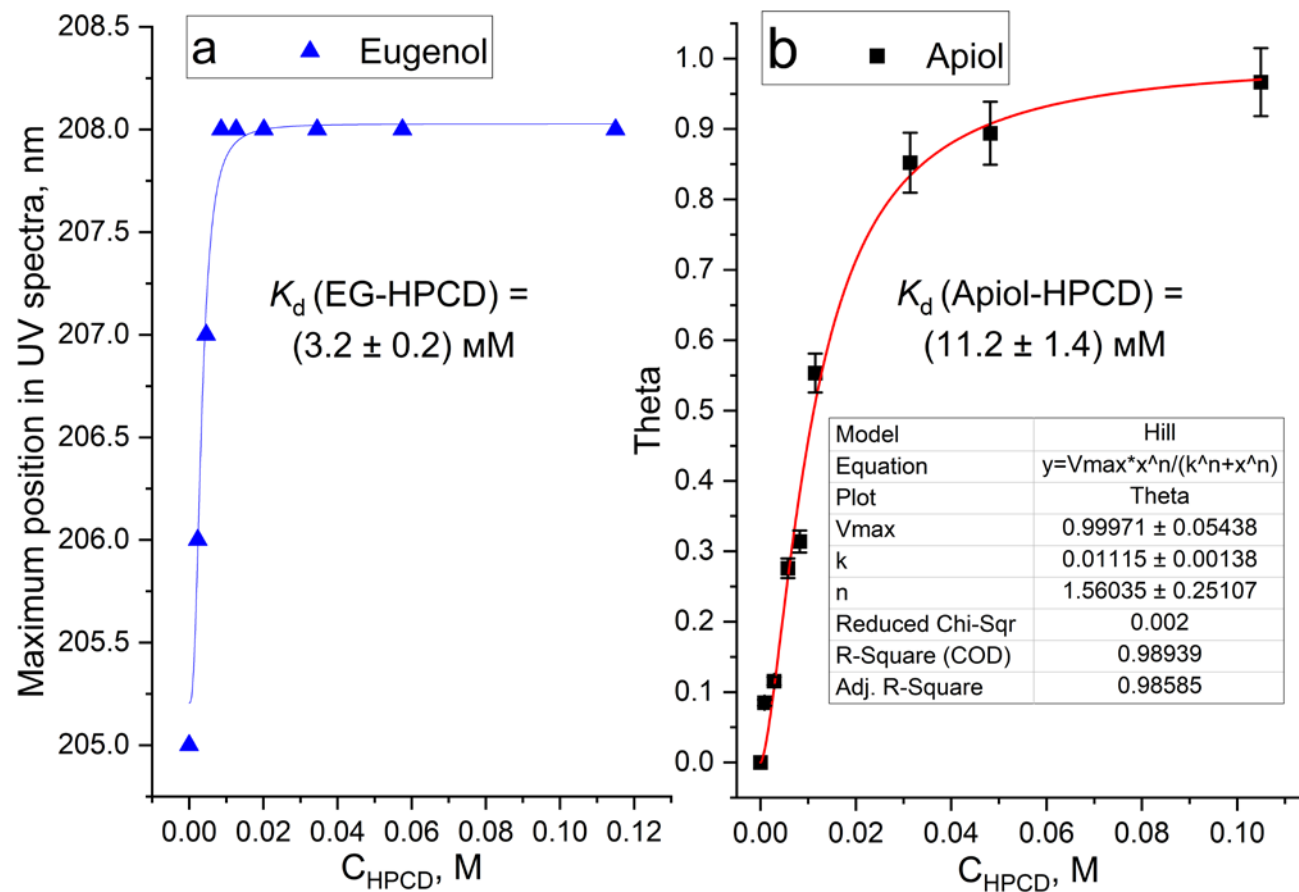

**Figure S3.** Entrapment efficiency (EE) of apiol (a) and eugenol (b) into (2-hydroxypropyl)- $\beta$ -cyclodextrin (HPCD) in aqueous solutions at 22 °C and  $A_{280}$ . Hill plots. The EE plateau is reached at a level lower than 100% due to the partial presence of EG and apiol in dissolved form in water, not in the form of a complex with CD. However, solubility efficiency is aiming for 100%.  $C_0$  – theoretical concentration under the assumption that 100% of the substance has dissolved,  $C_{\max}$  – the maximum practically achievable concentration.

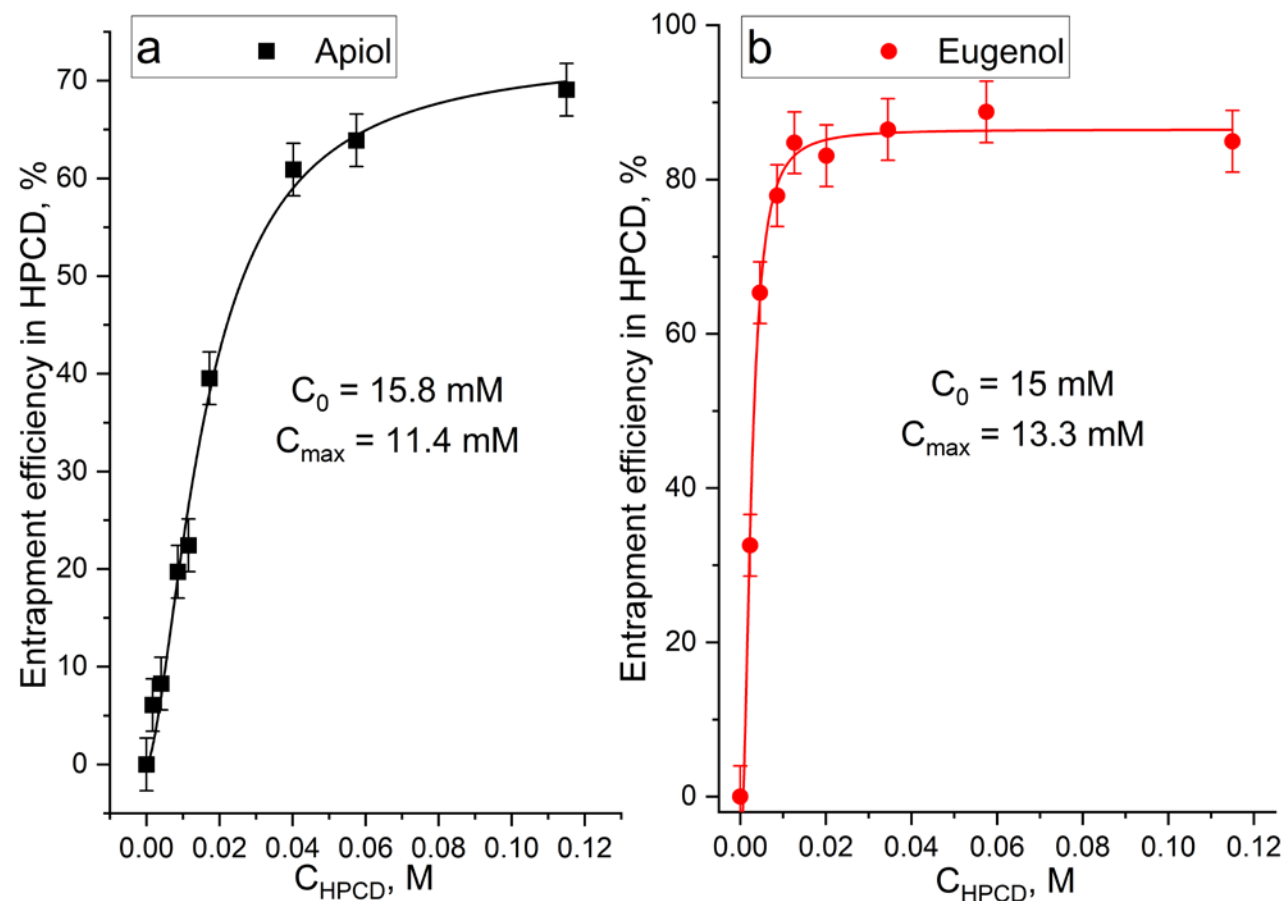

**Figure S4.** (a) FTIR spectra peak intensity at 1505 cm<sup>-1</sup> for apiol and its inclusion complexes with HPCD. (b) Minimum position of second derivative (d<sup>2</sup>A/dv<sup>2</sup>) of FTIR spectra of eugenol and its inclusion complexes with HPCD versus HPCD concentration. (c) Data of (b) converted to the Hill plot. Theta is a fraction of the bound substance:  $\theta = [\text{EG-HPCD}] / ([\text{EG-HPCD}] + [\text{EG}])$ . Aqueous solutions, 22 °C.

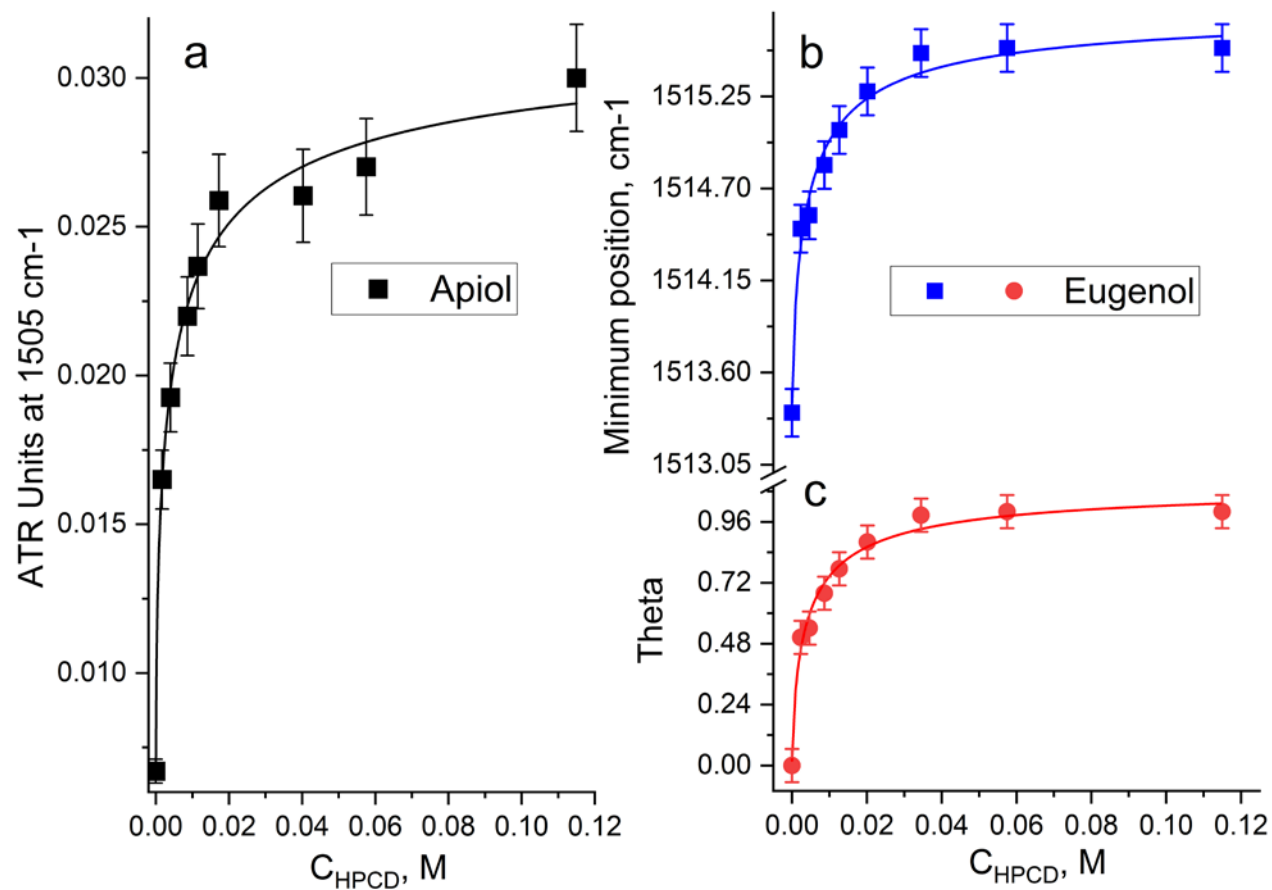



**Figure S5.** Second derivative ( $d^2A/d\nu^2$ ) of FTIR spectra of eugenol (EG) and its inclusion complex with HPCD. A baseline correction was applied. Conditions are given in Materials and Methods, sections 3.4 and 3.5.

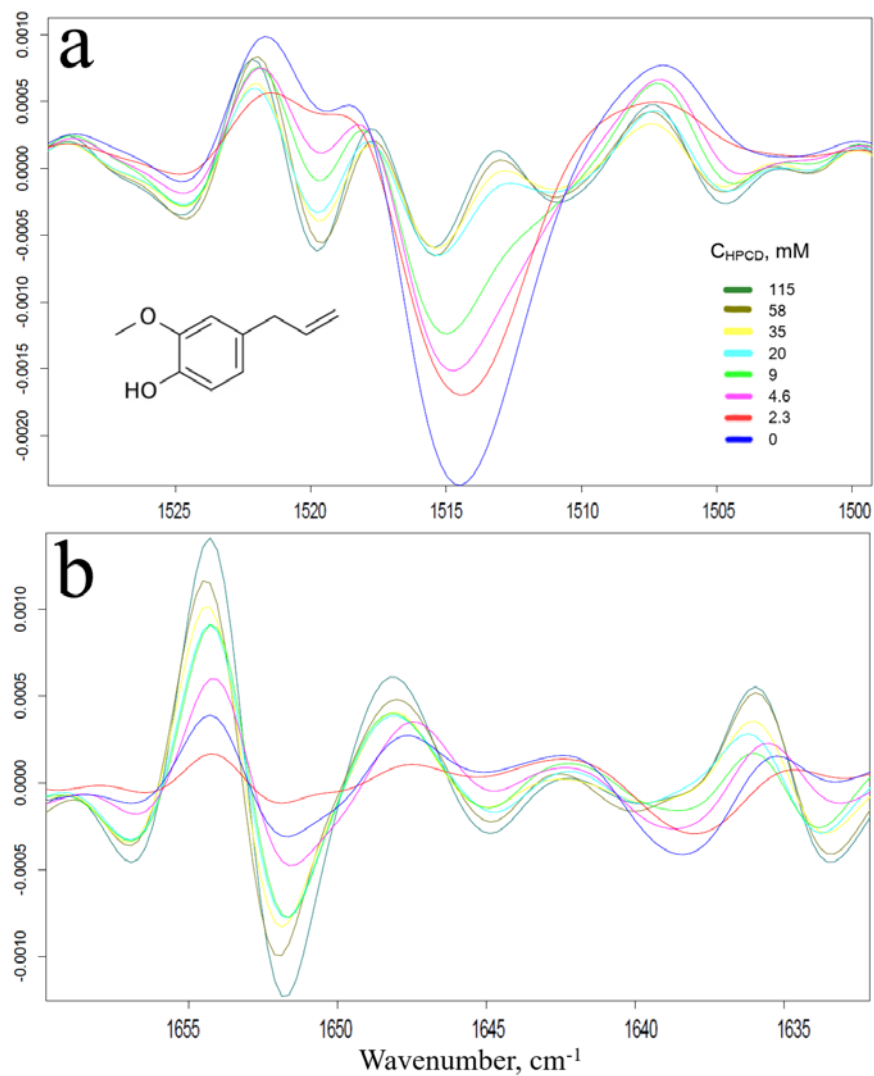

**Figure S6.** (a) Micrograph of the EG-HPCD solid inclusion complex of  $1.3 \times 1.5 \mu\text{m}$  in size. (b), (c) Corresponding FTIR spectra at 16 points selected in (a). (d) Integral intensity of  $1482\text{--}1562 \text{ cm}^{-1}$  region in solid phase FTIR spectra of eugenol-HPCD. (e) Integral intensity of  $1536\text{--}1499 \text{ cm}^{-1}$  region in solid phase FTIR spectra, normalized to the corresponding intensity of C–O–C bonds of cyclodextrin at  $1020\text{--}1180 \text{ cm}^{-1}$ .

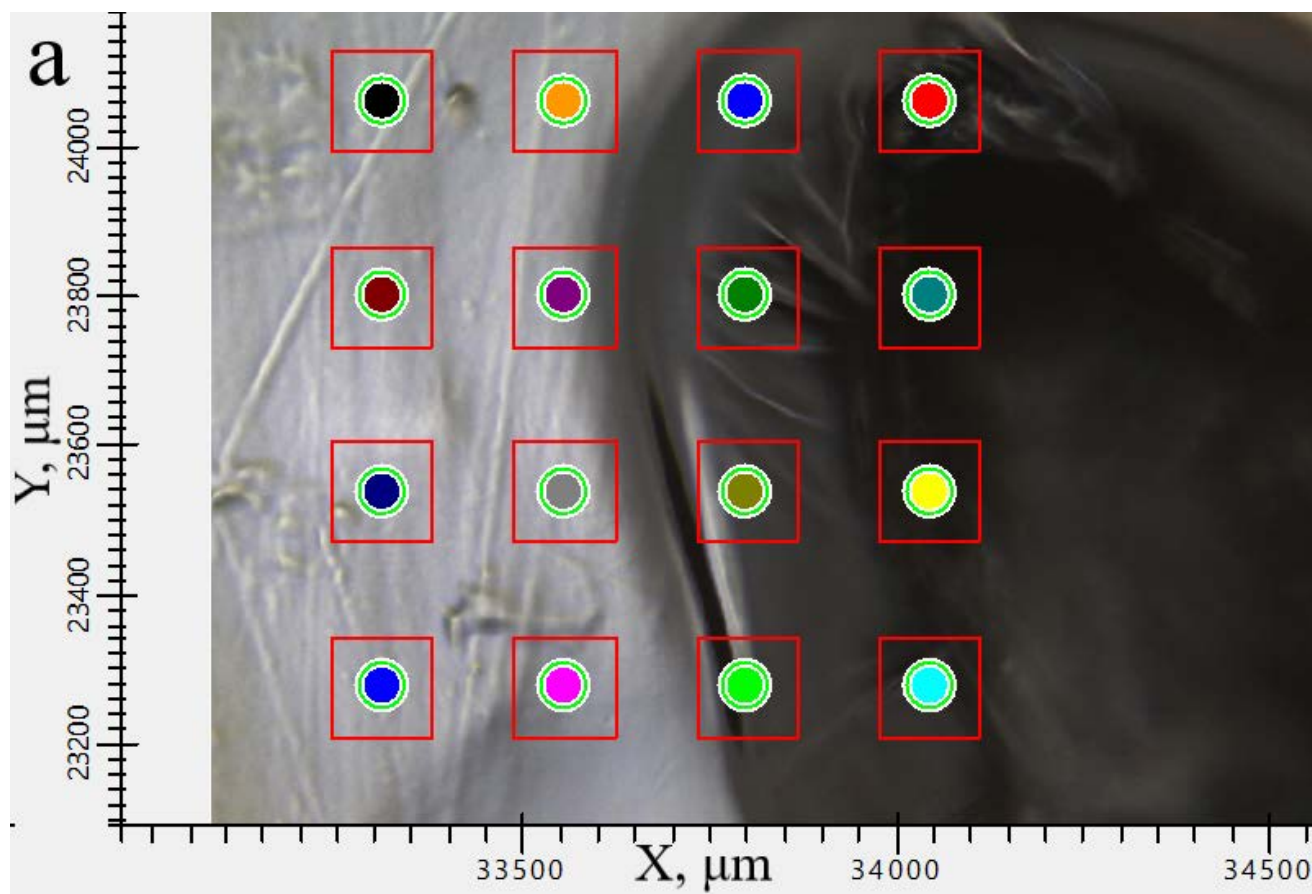

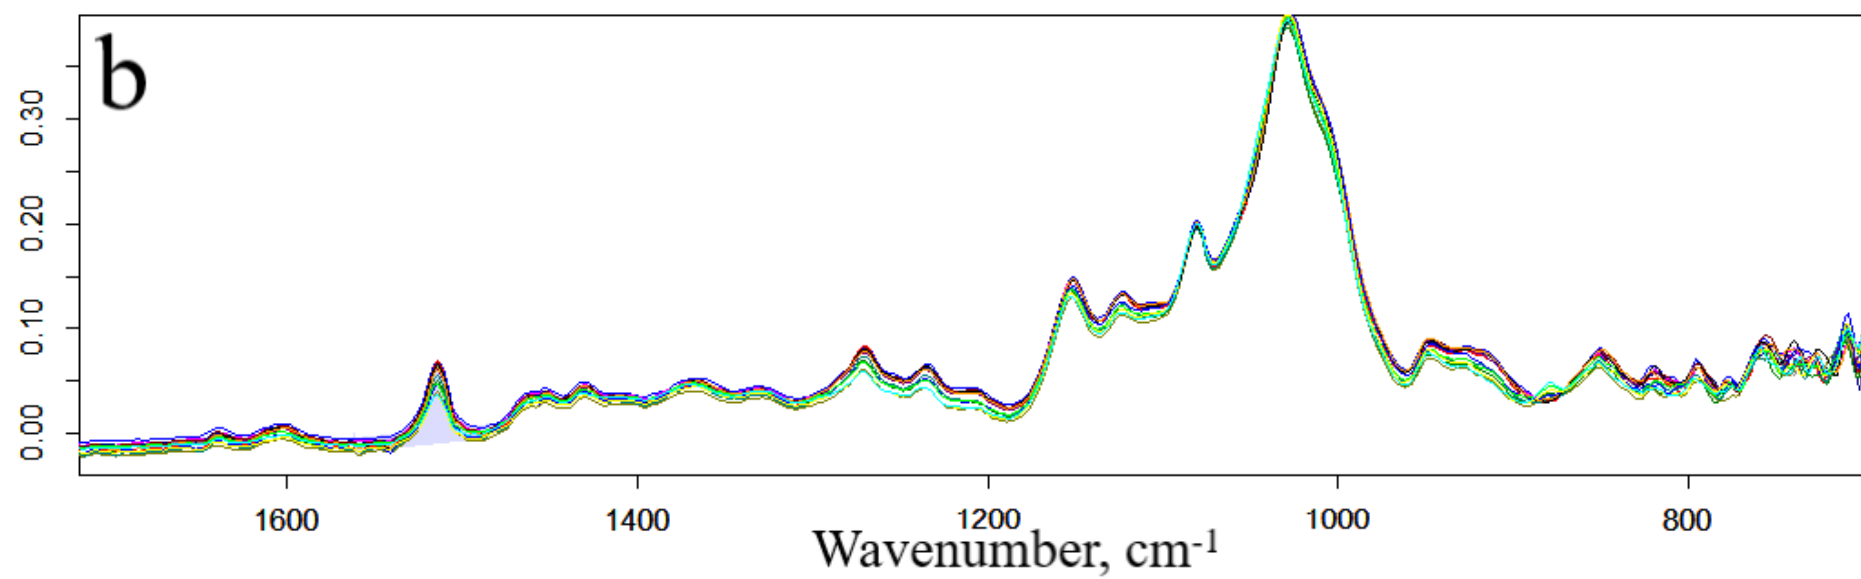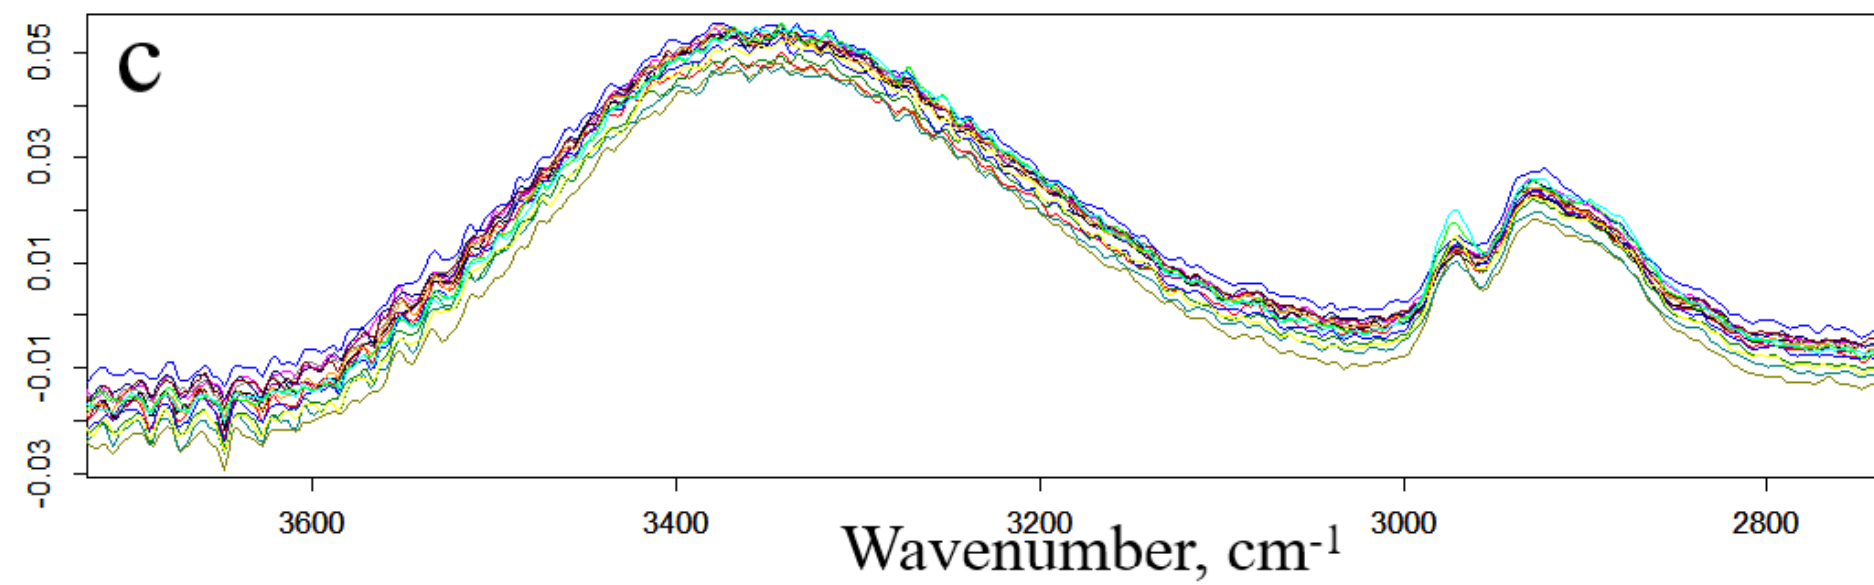

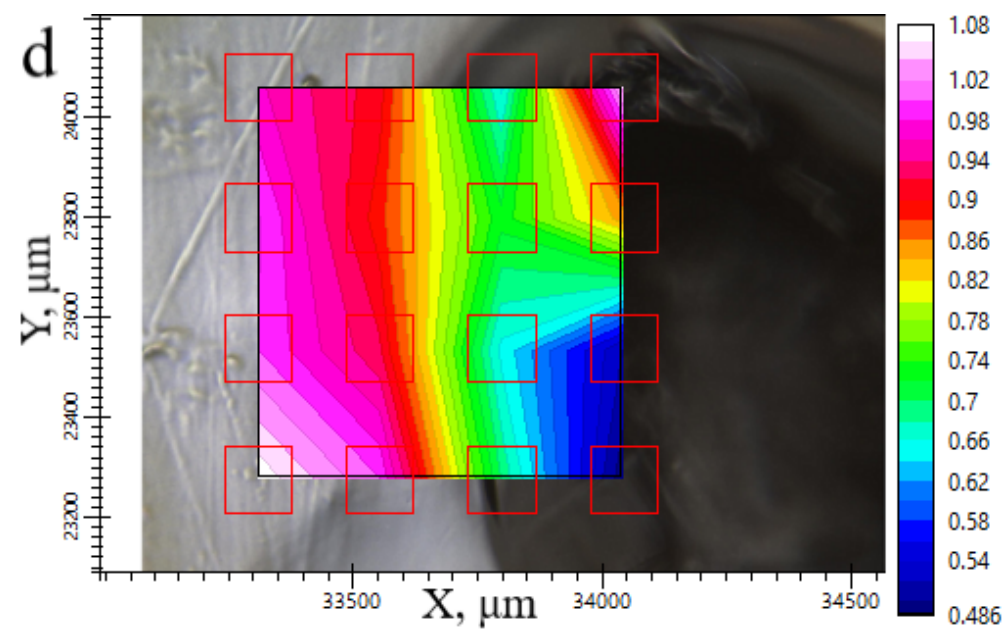

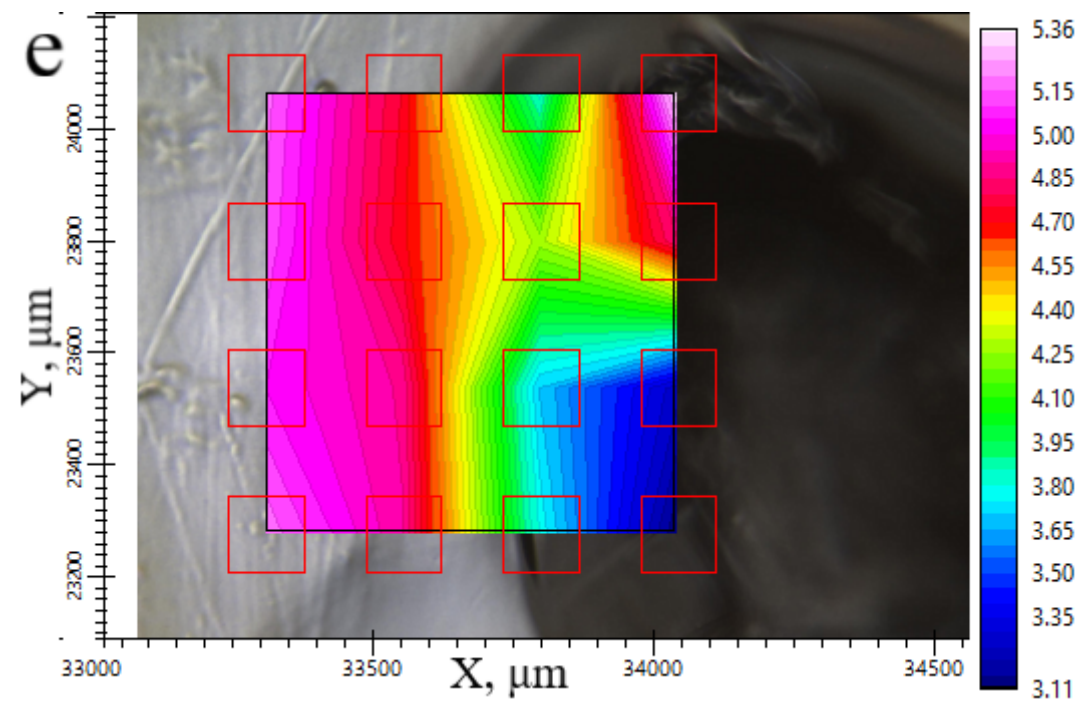

**Figure S7.** Micrographs illustrating the inclusion of eugenol (EG) in a HPCD. Dissolving oil droplets. (a) EG, (b) EG–HPCD (3.5:1), (c) EG–HPCD (1:1), (d) EG–HPCD (1:5). The molar ratio of the components is given in parentheses. Dissolving oil droplets of undissolved eugenol. Scale bar: 100  $\mu\text{m}$ .

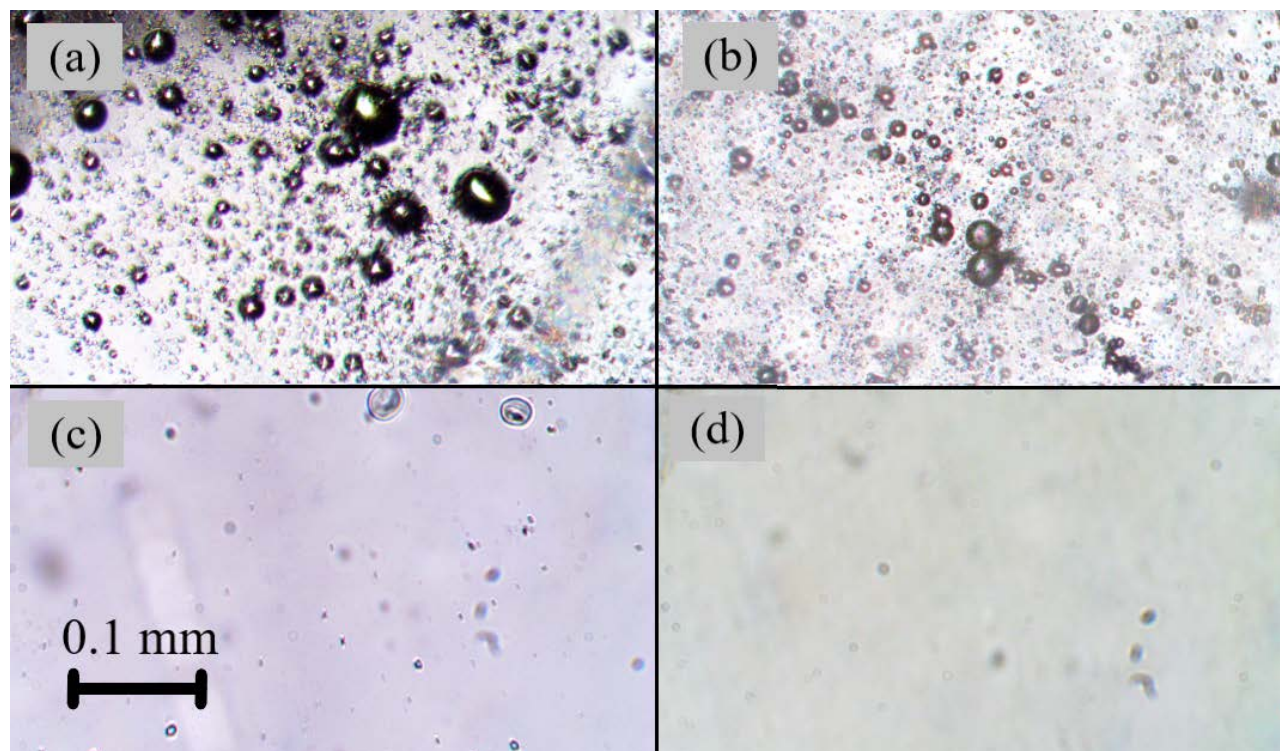



**Figure S8.** Micrographs illustrating the inclusion of apiol in a HPCD. Dissolving process. (a) Apiol, (b) Apiol–HPCD (2:1), (c) Apiol–HPCD (1:1), (d) Apiol–HPCD (1:15). The molar ratio of the components is given in parentheses. Scale bar: 100  $\mu\text{m}$ .

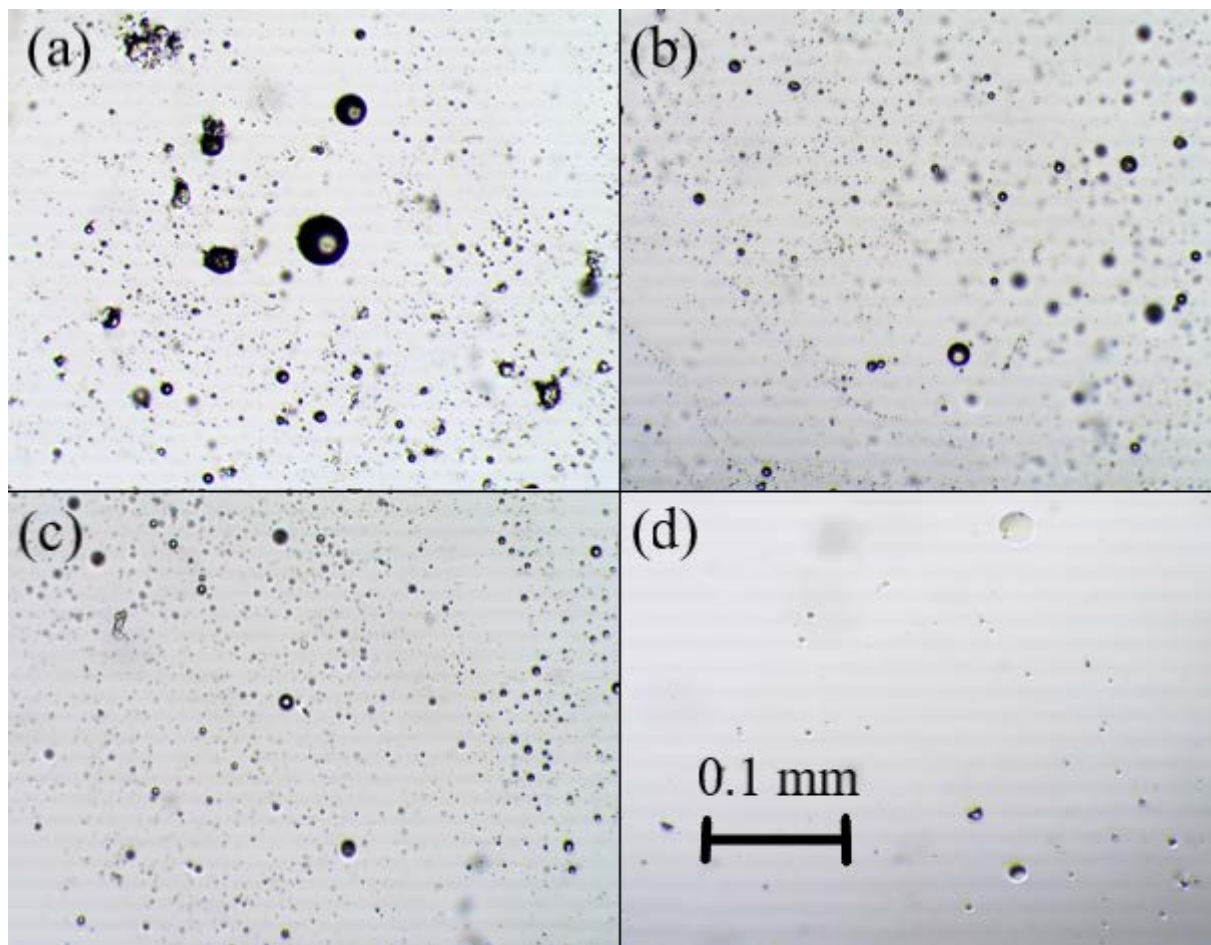

**Figure S9.**  $^1\text{H}$  NMR-spectra (600 MHz) of apiol in DMSO- $d_6$  (A); MCD-apiol in  $\text{D}_2\text{O}$ , molar ratio 2:1 (B); HPCD-EG in  $\text{D}_2\text{O}$ , molar ratio 2:1 (C); HPCD-Lev-EG in  $\text{D}_2\text{O}$ , molar ratio 4:1:1 (D). Computer simulation's structures of CD (E), MCD (F), HPCD (G) in comparison with literature X-ray data (H) [43].

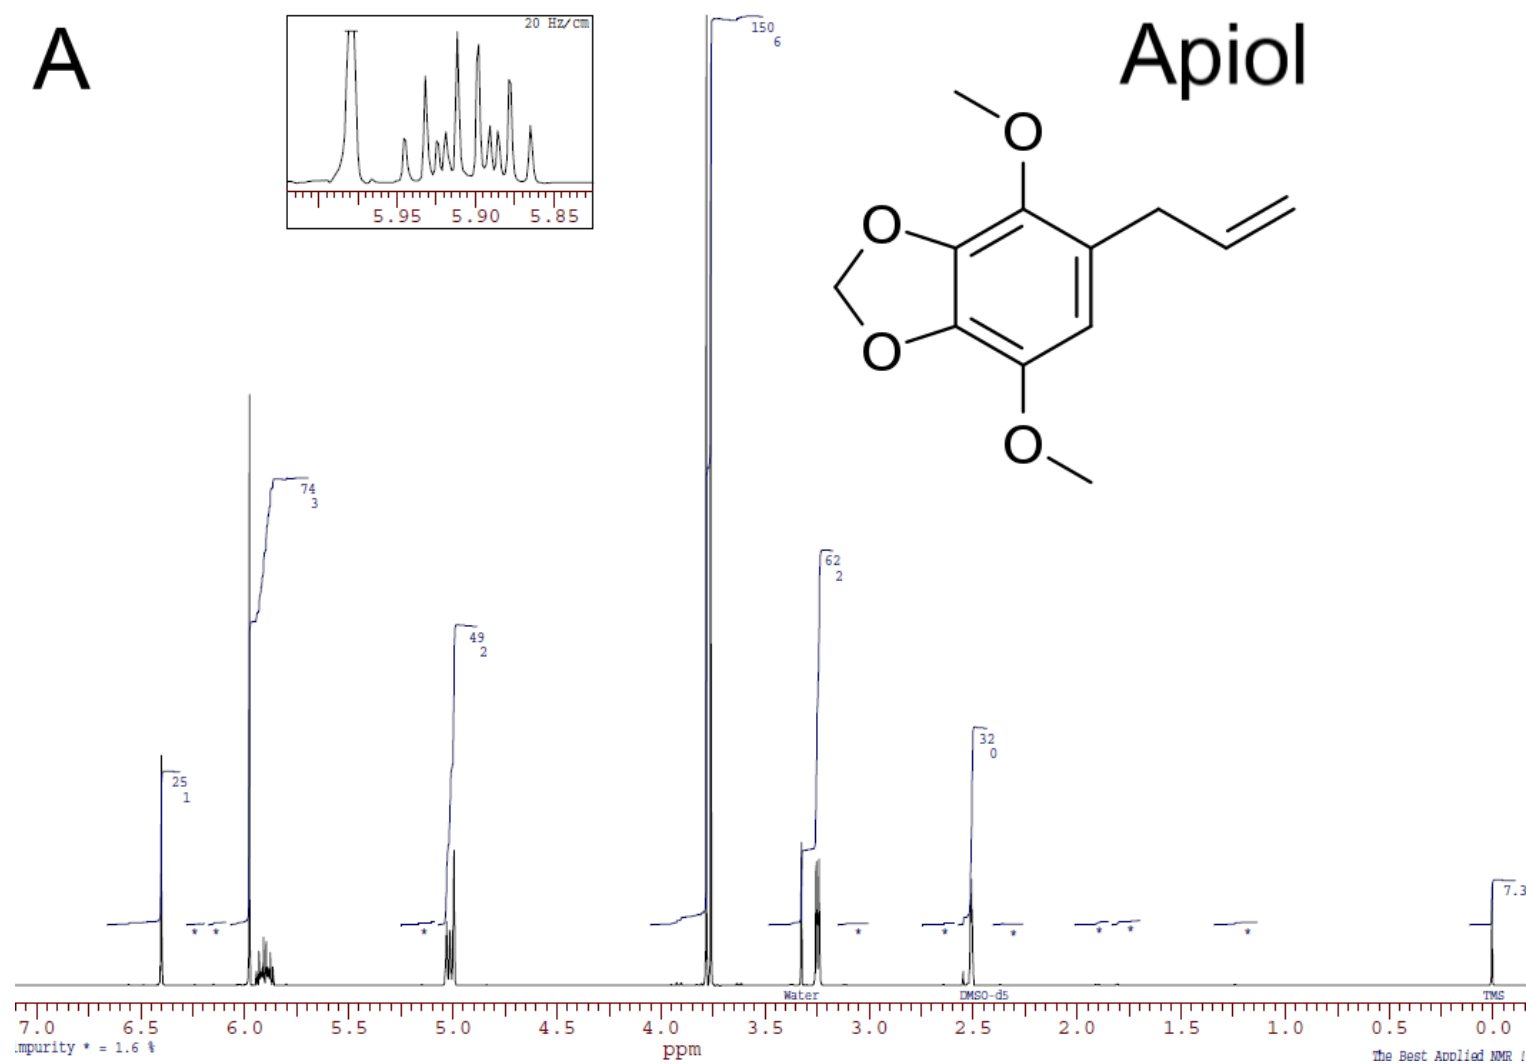



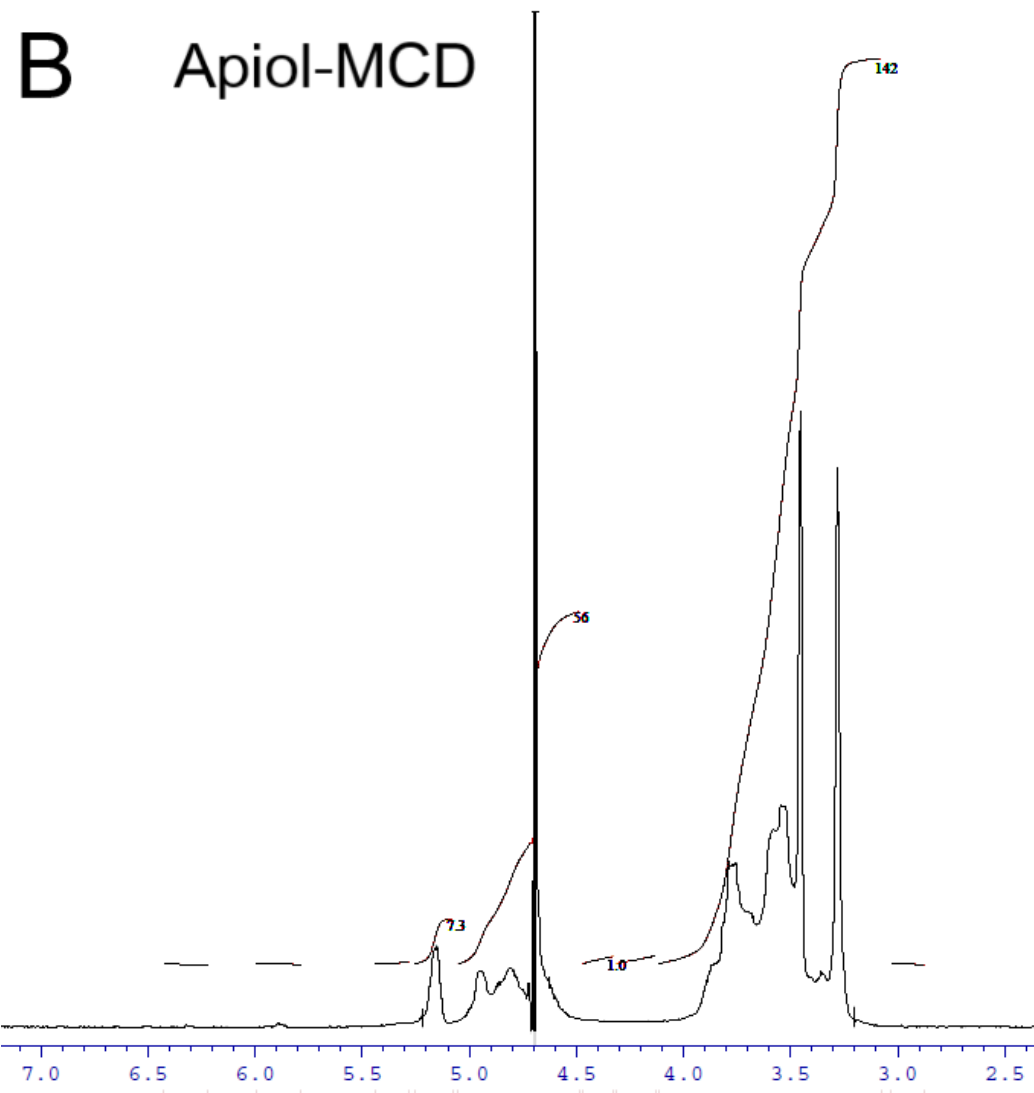

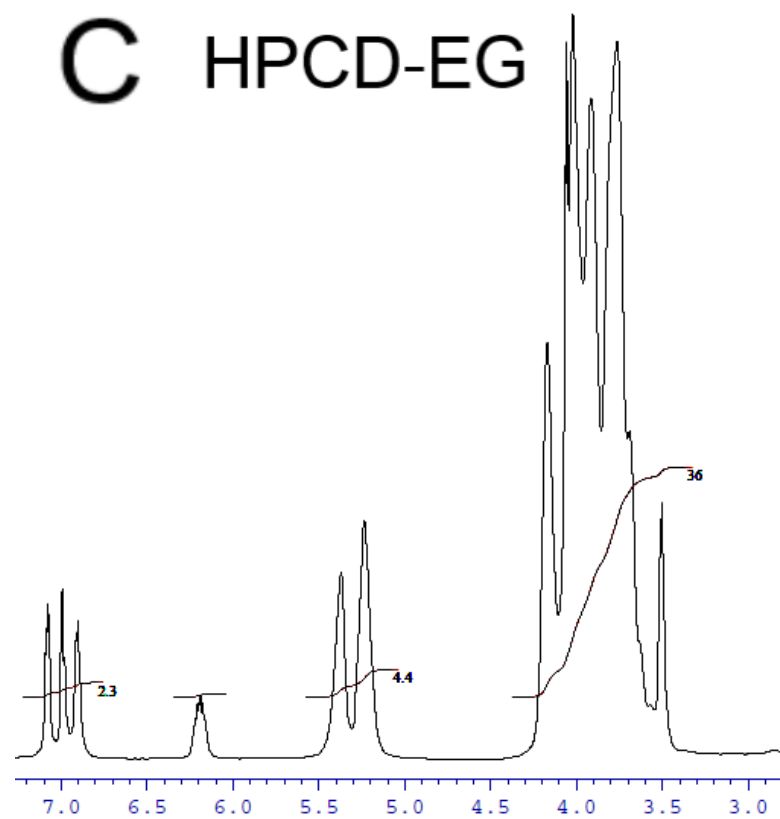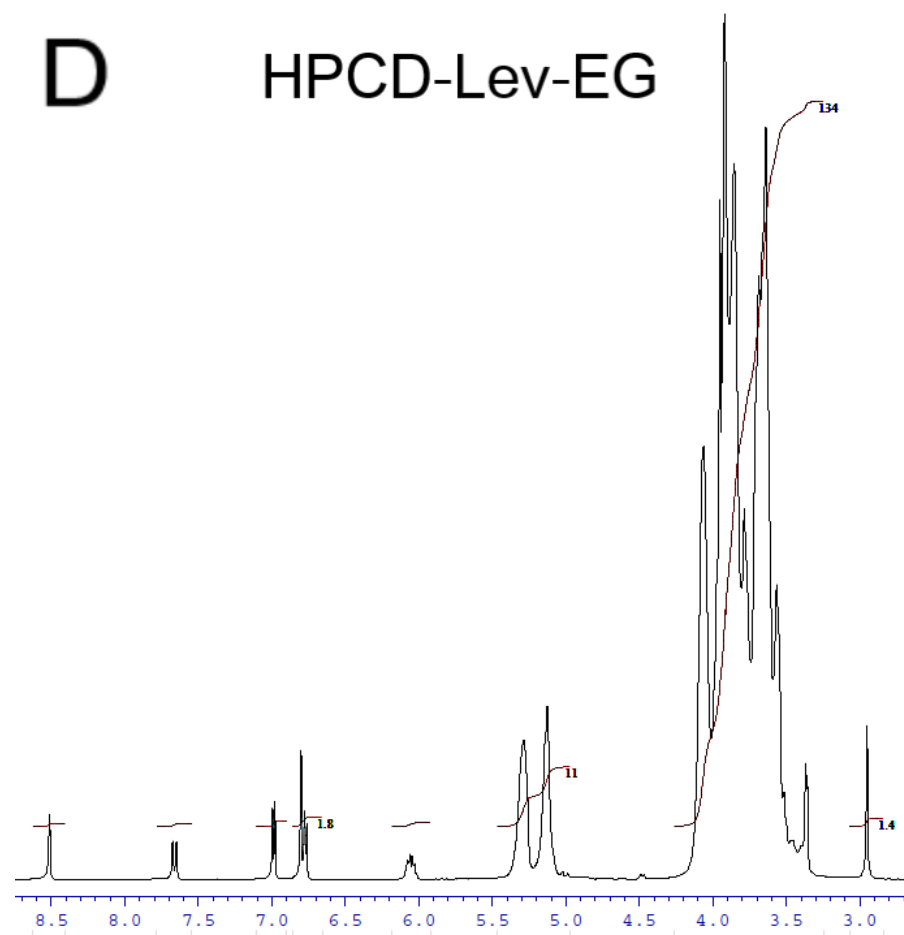

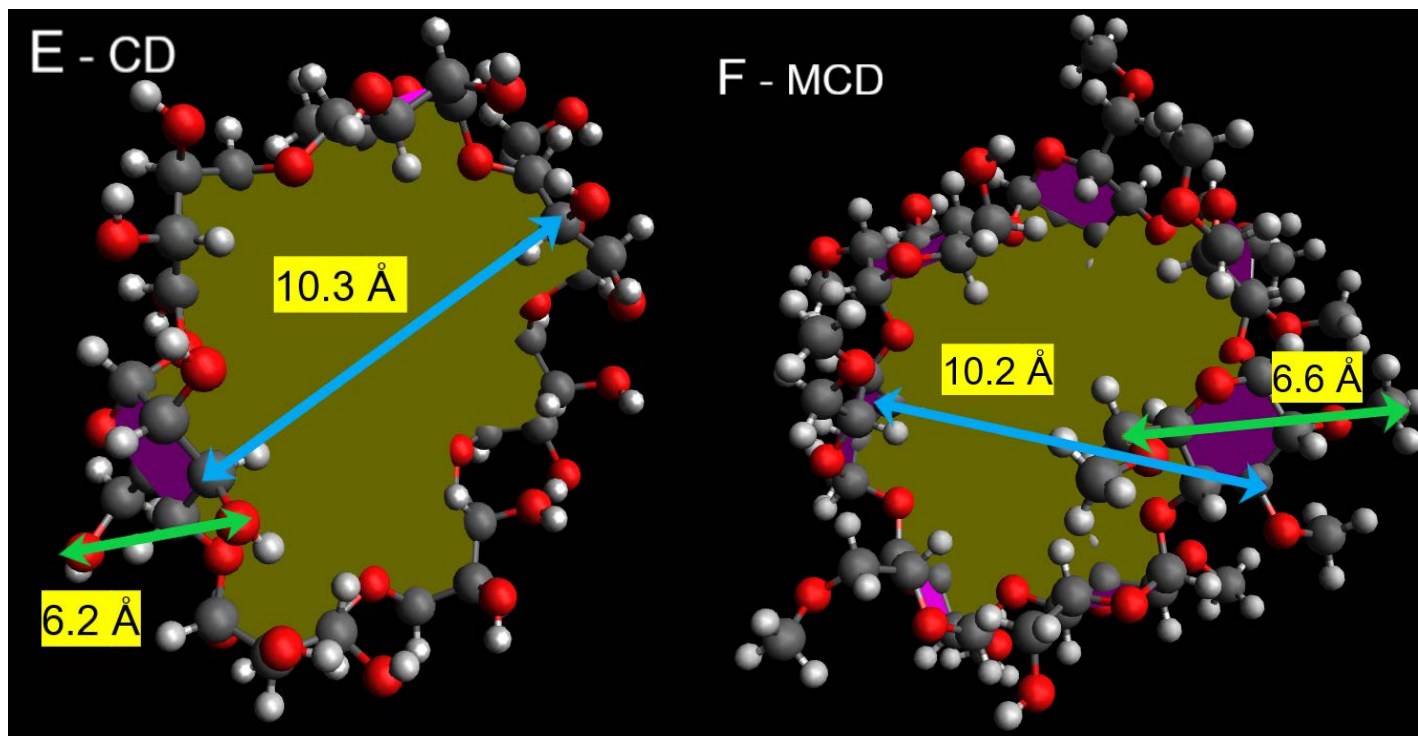

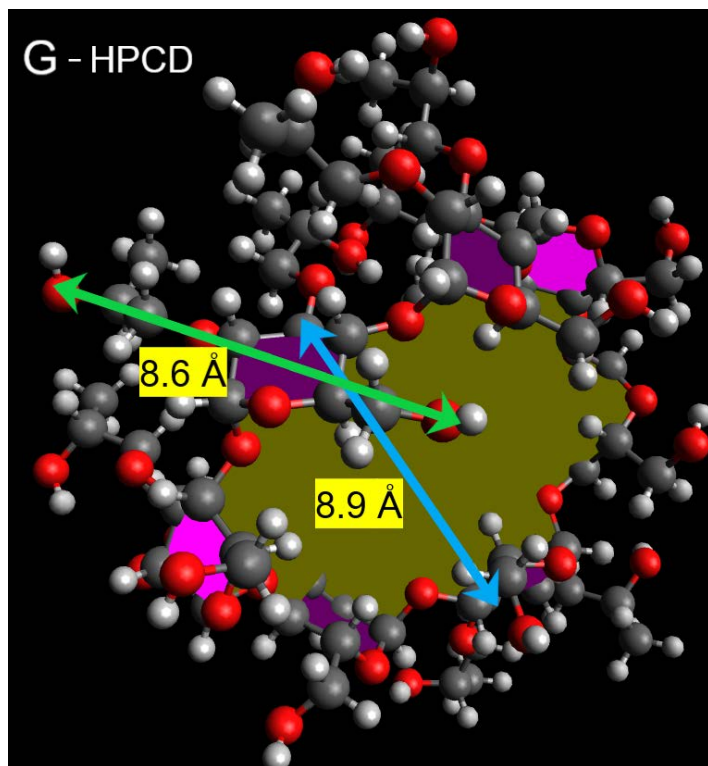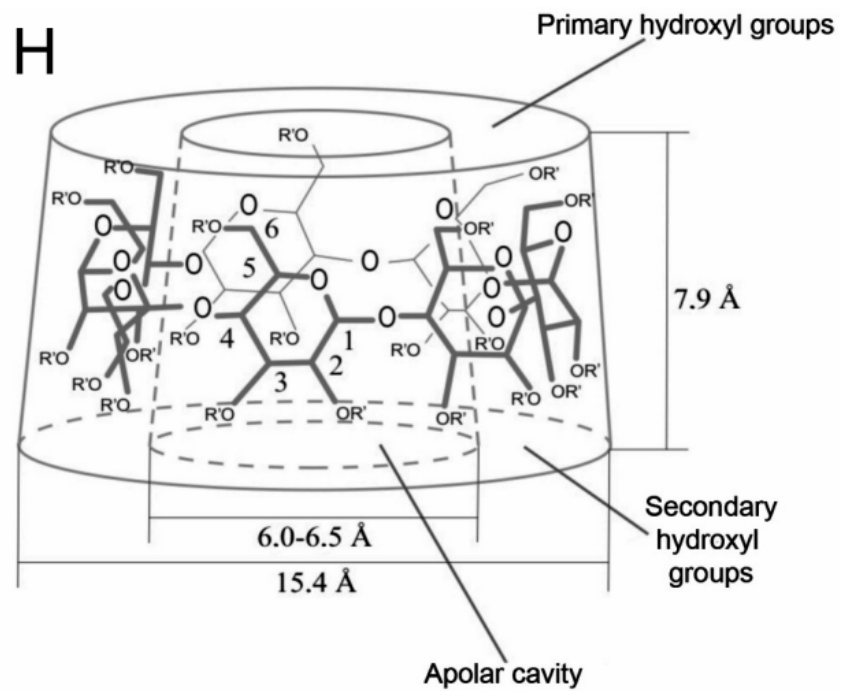

**Figure S10.** *B. subtilis* growth inhibition by (a) levofloxacin–MCD (1:2), (b) eugenol–MCD (1:2). The molar ratio of the components is given in parentheses. Small bold red crosses refer to the absence of bacterial growth inhibition; large green crosses indicate the diameter of growth inhibition zone. Experimental conditions here and thereafter in Figures S11–S14: pH 7.4 (0.01 M PBS), 37 °C, 24 h of incubation. MCD: methyl- $\beta$ -cyclodextrin.

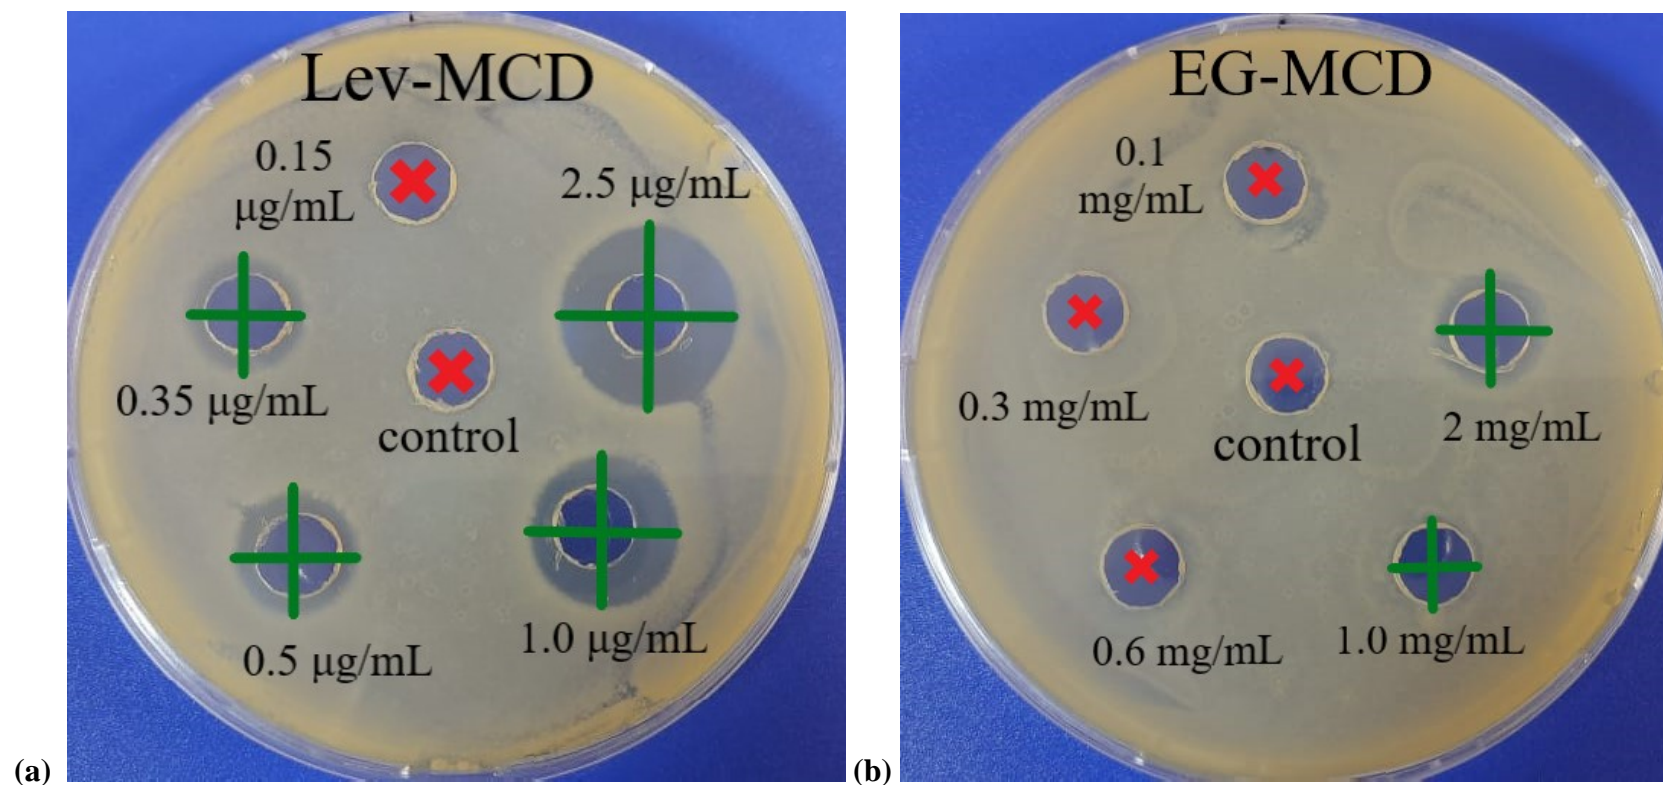

**Figure S11.** *E. coli* growth inhibition by levofloxacin–MCD (C(Lev) = 0.15 µg/mL) with adjuvant menthol–MCD (the concentrations of menthol are indicated in the figure). Small bold red crosses refer to the absence of bacterial growth inhibition; large red crosses indicate the diameter of growth inhibition zone.

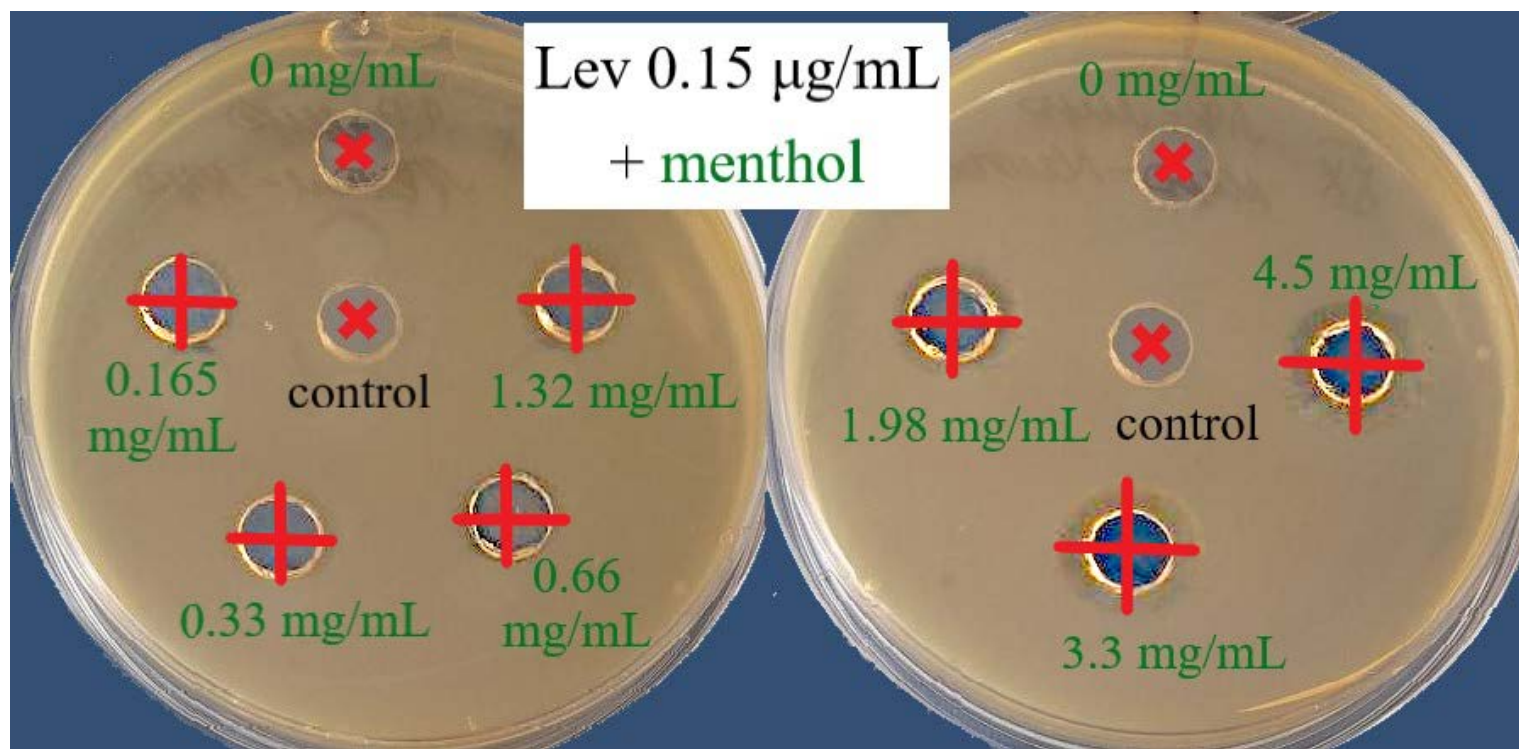



**Figure S12.** *E. coli* growth inhibition by levofloxacin–MCD (C(Lev) = 0.15  $\mu$ g/mL) with adjuvant apiol–MCD (the concentrations of apiol are indicated in the figure). Small bold red crosses refer to the absence of bacterial growth inhibition. Black crosses indicate the diameter of growth inhibition zone.

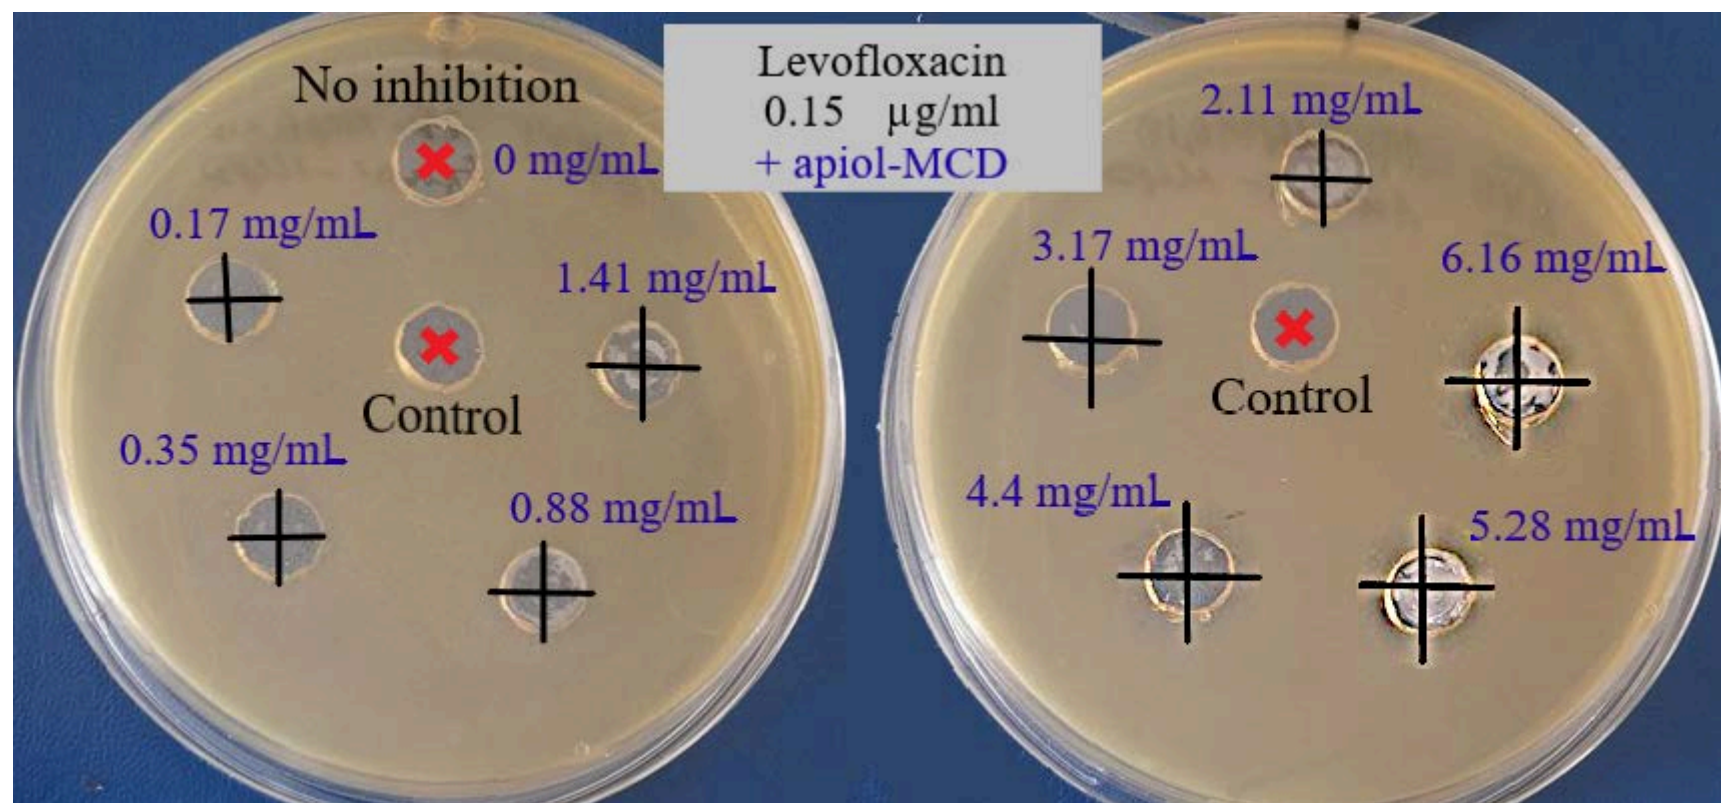

**Figure S13.** *B. subtilis* growth inhibition by levofloxacin–MCD (C(Lev) = 0.4; 0.7 and 1.5  $\mu\text{g/mL}$ ) with adjuvant eugenol–MCD (the concentrations of eugenol are indicated in the figure). Small bold red crosses refer to the absence of bacterial growth inhibition. Black crosses indicate the diameter of growth inhibition zone.

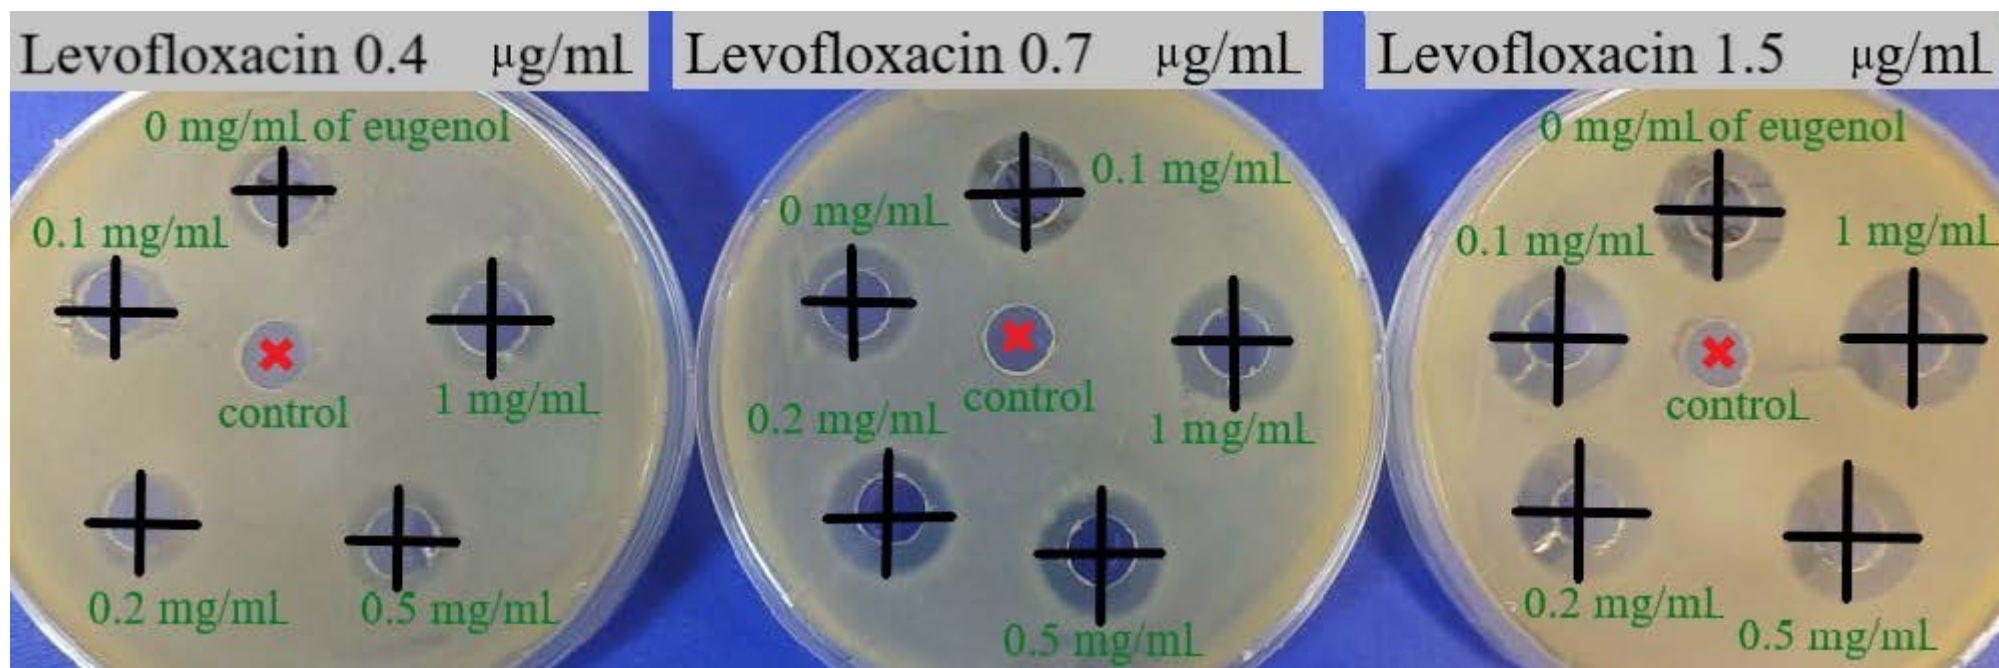



**Figure S14.** *B. subtilis* growth inhibition by levofloxacin–MCD (C(Lev) = 0.4; 0.7 and 1.5  $\mu\text{g/mL}$ ) with adjuvant safrole–MCD (the concentrations of safrole are indicated in the figure). Small bold red crosses refer to the absence of bacterial growth inhibition. Black crosses indicate the diameter of growth inhibition zone.

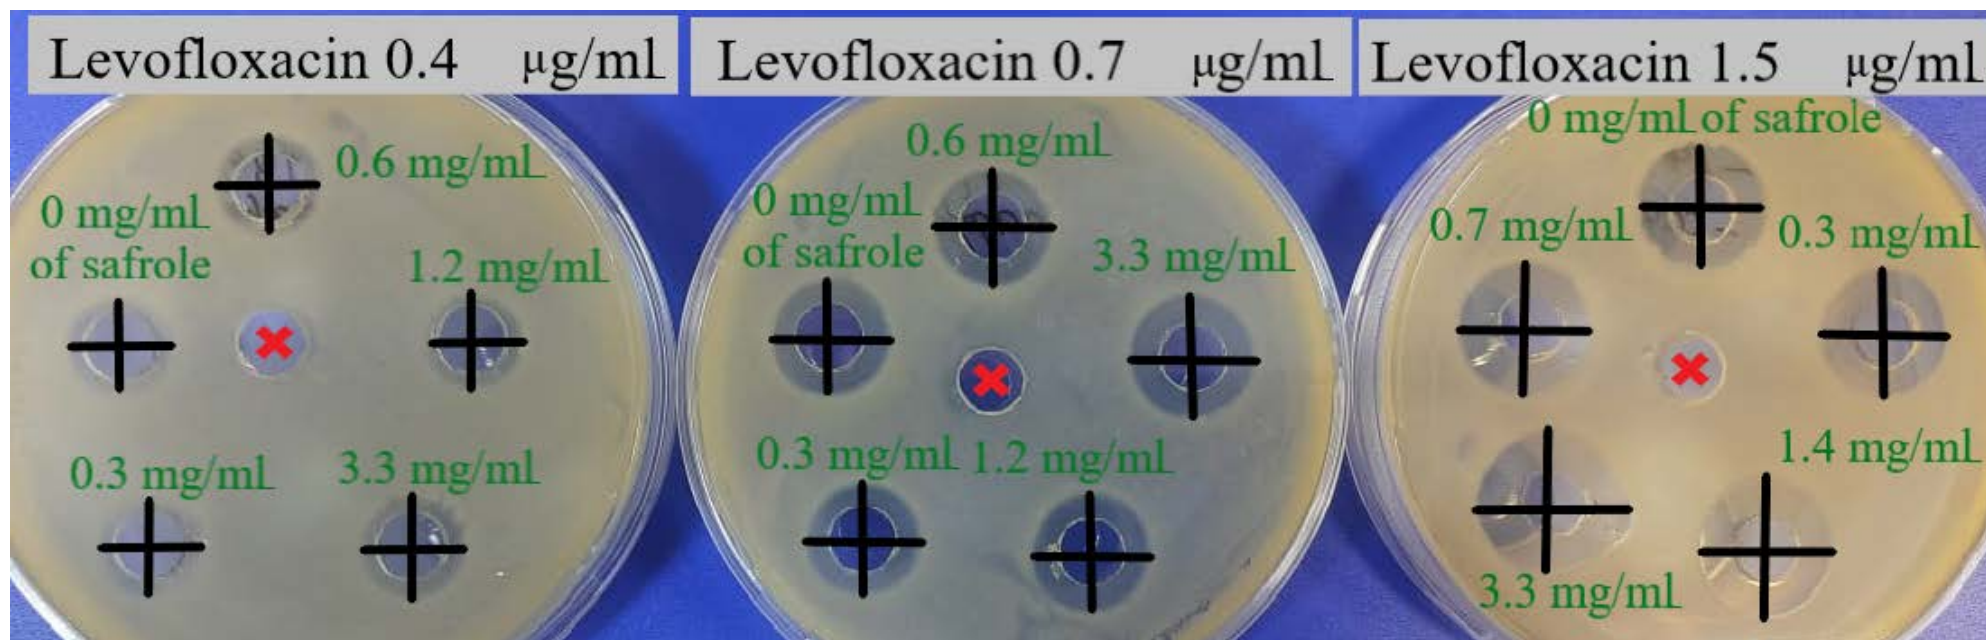

Supplement: s1 [file s1]
